# Supplementary material
Source: PubMed Central journal article supplement (PMC2953062)
Supplement: supp_30_21_5021__1.pdf [file supp_30_21_5021__1.pdf]

Supplemental Table 1

Primers for mapping the JunD 3'-UTR

| <b>Fraction</b>   | <b>Sense</b>                 | <b>Antisense</b>              |
|-------------------|------------------------------|-------------------------------|
| <b>Fraction 1</b> | <b>GTATTGAGCCCGAGCGCGGGA</b> | <b>TCCCCATCCAGAGTAAAGG</b>    |
| <b>Fraction 2</b> | <b>CCTTACTCTGGATGGGGA</b>    | <b>TAAAGGCAGAGCGTGAGGCTGC</b> |
| <b>Fraction 3</b> | <b>GCAGCCTCACGCTCTGCCTTA</b> | <b>GACACTCCCGTTCTCTCTTC</b>   |
| <b>Fraction 4</b> | <b>GAAGAGAGAACGGGAGTGTC</b>  | <b>GTGTCGGGAGGAGGAGAGAG</b>   |
| <b>Fraction 5</b> | <b>CTCTCTCCTCCTCCCGACAC</b>  | <b>TGGCGTAACGAAGACTTAC</b>    |
