# Supplementary material
Source: PubMed Central journal article supplement (PMC2953062)
Supplement: supp_30_21_5021__2.pdf [file supp_30_21_5021__2.pdf]

Supplemental Table 2

AU and U percentages at different segments of the JunD 3'-UTR

| <b>Fragment</b> | <b>size (bp)</b> | <b>AU (bp)</b> | <b>AU (%)</b> | <b>U (bp)</b> | <b>U (%)</b> |
|-----------------|------------------|----------------|---------------|---------------|--------------|
| F1              | 124              | 40             | 32            | 21            | 17           |
| F2              | 139              | 46             | 33            | 28            | 20           |
| F3              | 86               | 55             | <b>64*</b>    | 45            | <b>52*</b>   |
| F4              | 170              | 88             | 52            | 49            | 28           |
| F5              | 127              | 66             | <b>52*</b>    | 52            | <b>41*</b>   |
