# Supplementary material
Source: PubMed Central journal article supplement (PMC2953062)
Supplement: supp_30_21_5021__3.pdf [file supp_30_21_5021__3.pdf]

Supplemental Table 3

**Cellular Polyamine Concentrations in ODC-IEC Cells** (nmol/mg protein)

|                    | Putrescine   | Spermidine  | Spermine     |
|--------------------|--------------|-------------|--------------|
| Parent IEC-6 cells | 0.1 ± 0.03   | 1.14 ± 0.04 | 1.5 ± 0.08   |
| Vector alone       | 0.11 ± 0.02  | 1.2 ± 0.05  | 1.47 ± 0.07  |
| ODC-IEC-C1         | 1.78 ± 0.08* | 2.9 ± 0.07* | 1.91 ± 0.08* |
| ODC-IEC-C2         | 1.86 ± 0.08* | 3.3 ± 0.09* | 1.84 ± 0.07* |

\* P < 0.05 compared with parent IEC-6 cells and cells infected with control retroviral vector
